# Supplementary material for: Structure–Property Relationships for Fluorinated and Fluorine-Free Superhydrophobic Crack-Free Coatings
Source: MDPI journal article supplement (doi:10.3390/polym16070885), 2024-03-24
Supplement: s1 [file s1]

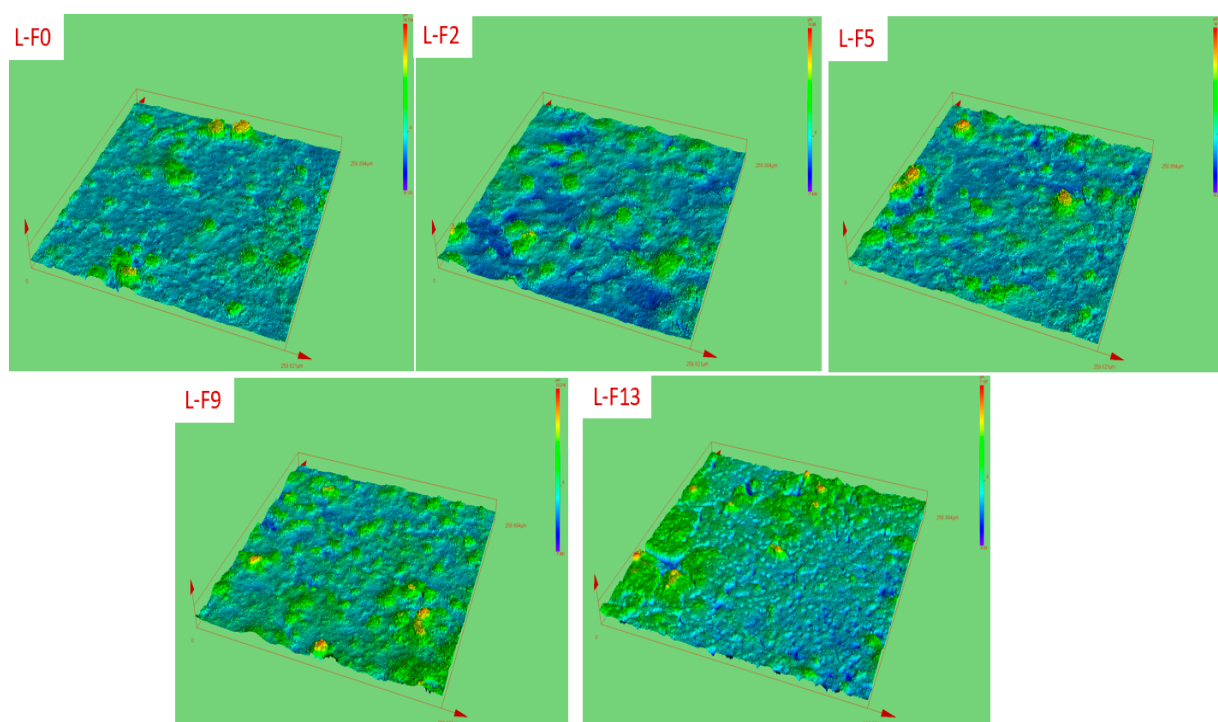

Figure S1. Confocal laser microscopy 3D images of L-F series coatings.

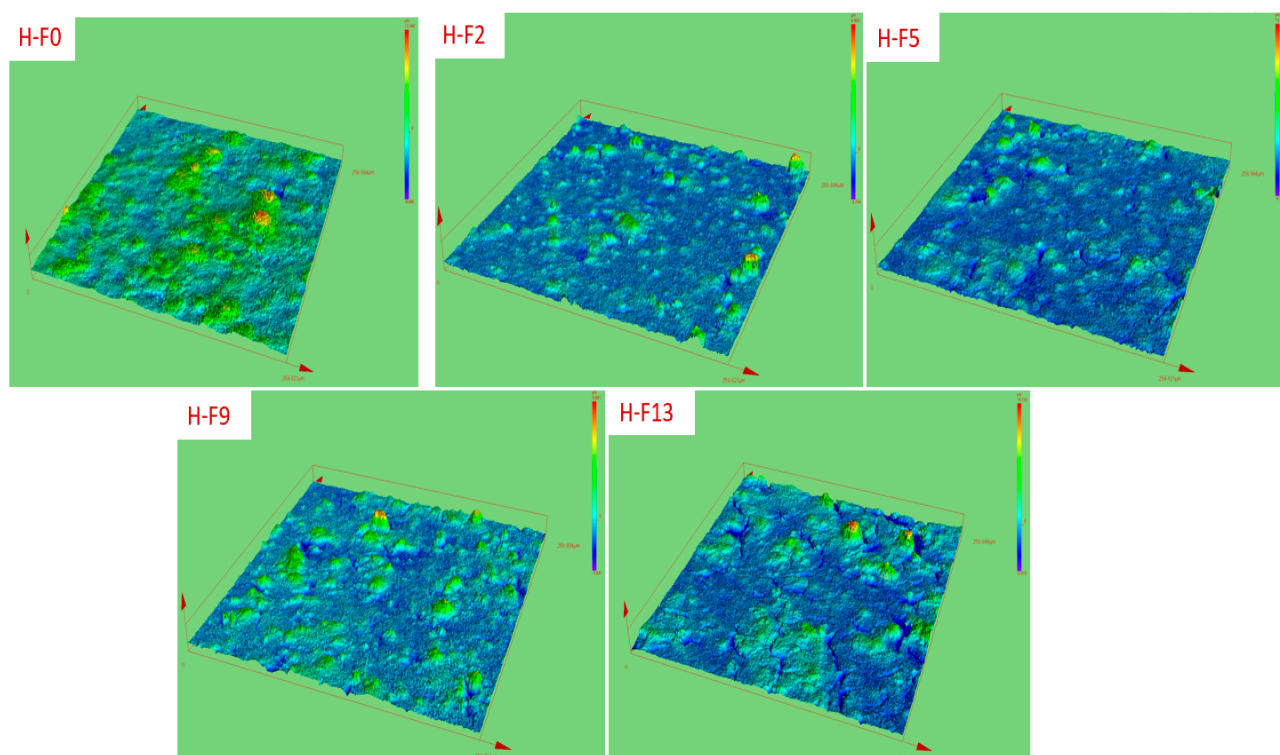

Figure S2. Confocal laser microscopy 3D images of H-F series coatings.

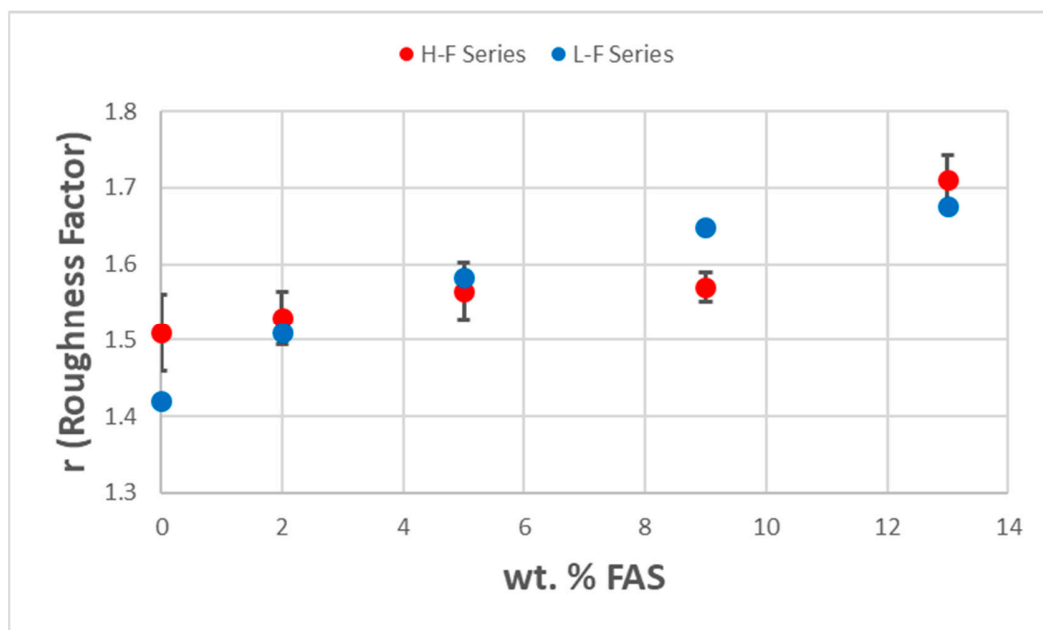

Figure S3. The Relationship of  $r$  with FAS content and particle loading

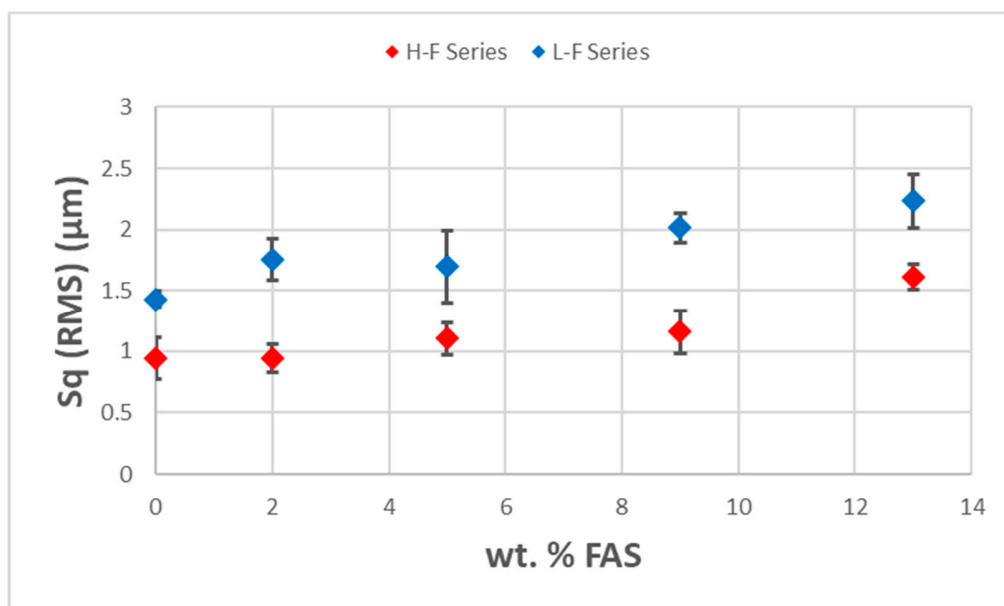

Figure S4. The Relationship of  $Sq$  with FAS content and particle loading
